# Supplementary material for: A novel inhibitor of the insulin/IGF signaling pathway protects from age-onset, neurodegeneration-linked proteotoxicity
Source: PubMed Central journal article supplement (PMC4326862; doi:10.1111/acel.12171), 2013-11-22
Supplement: acel0013-0165-sd1.pdf [file acel0013-0165-sd1.pdf]

## Supplementary figures

Figure S1

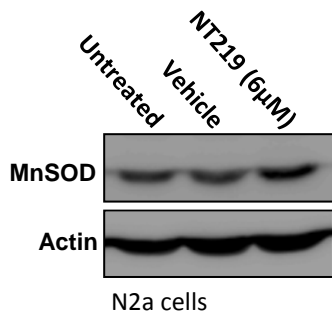

Figure S2

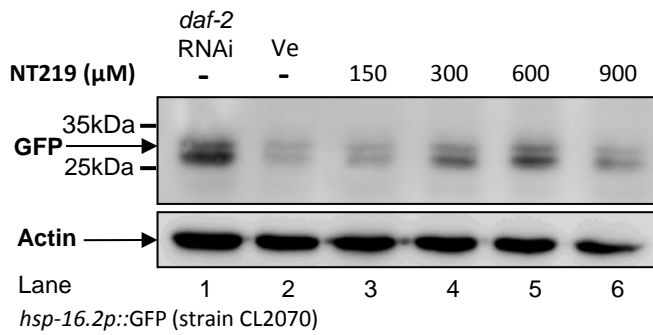

Figure S3

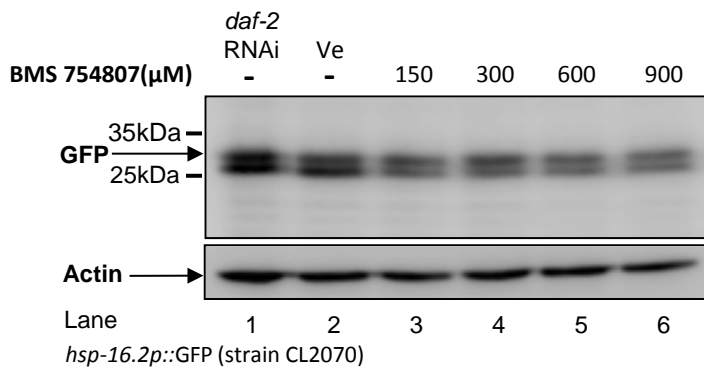

Figure S4

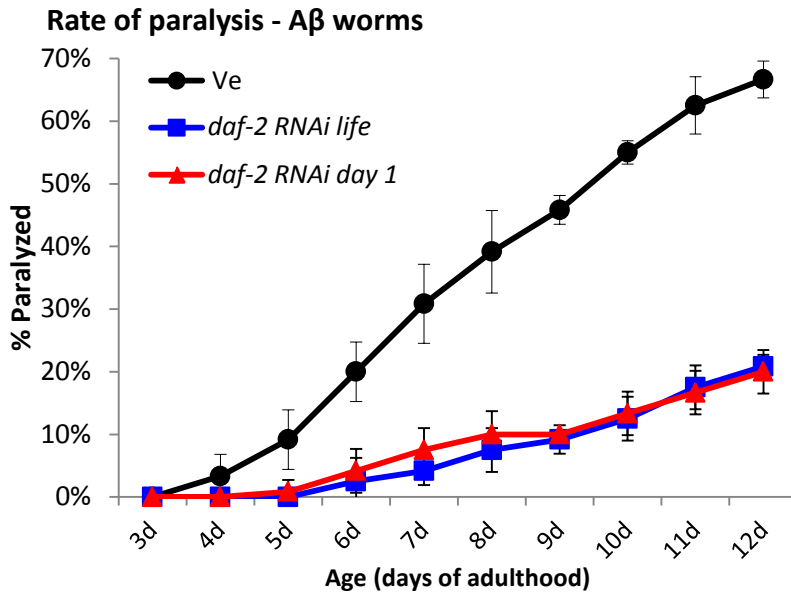

Figure S5

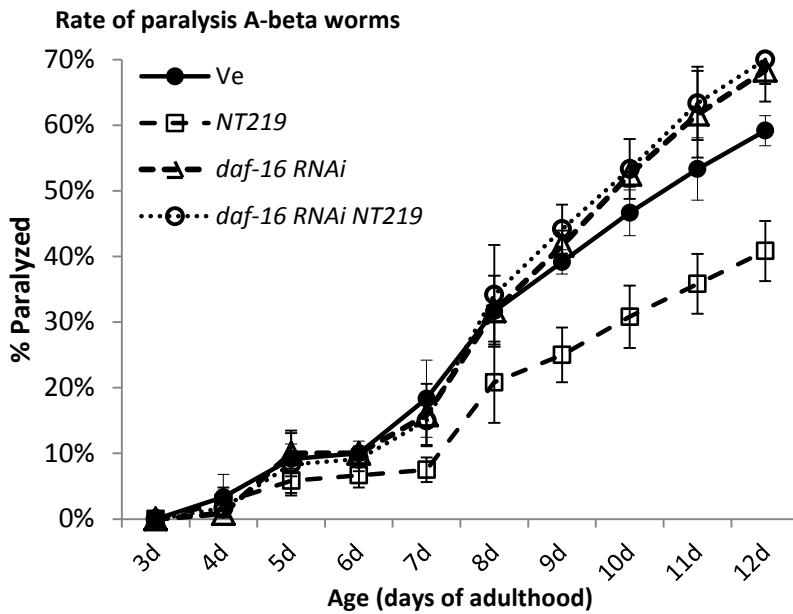

Figure S6

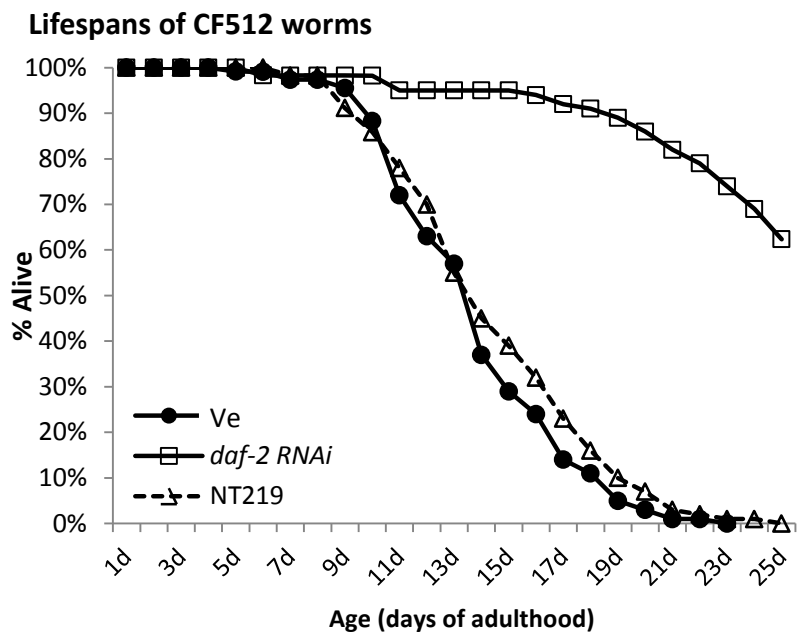

## Supplementary table 1

Relative motility of polyQ35-YFP worms (corresponding figure 4C)

| Strain      | Treatment         | n  | Average speed ( $\mu\text{m}/\text{sec}$ ) |                  | Relative speed<br>day 1/day 11 | <i>p</i> value (day 11) |                         |                                         |
|-------------|-------------------|----|--------------------------------------------|------------------|--------------------------------|-------------------------|-------------------------|-----------------------------------------|
|             |                   |    | day 1                                      | day 11           |                                | vs. polyQ0-YFP<br>(EV)  | vs. polyQ35-YFP<br>(EV) | vs. polyQ35-YFP<br>( <i>daf-2</i> RNAi) |
| polyQ0-YFP  | None (EV)         | 56 | 46.4 $\pm$ 1.41                            | 14.74 $\pm$ 0.75 | 31.8%                          |                         |                         |                                         |
| polyQ35-YFP | None (EV)         | 56 | 69.65 $\pm$ 2.07                           | 6.14 $\pm$ 0.38  | 8.8%                           | <0.0001                 |                         |                                         |
| polyQ35-YFP | <i>daf-2</i> RNAi | 56 | 54.0 $\pm$ 1.93                            | 40.7 $\pm$ 0.89  | 75.4%                          | <0.0001                 | <0.0001                 |                                         |
| polyQ35-YFP | NT219             | 56 | 51.21 $\pm$ 1.49                           | 16.87 $\pm$ 0.84 | 32.9%                          | >0.05                   | <0.0001                 | <0.0001                                 |

## Supplementary table 2

Lifespans (corresponding figures 6C, D)

| Strain | Treatment         | Mean lifespan $\pm$ SEM (days) | number of animals<br>/ initial number | % lifespan<br>of control | P value<br>(against control) |
|--------|-------------------|--------------------------------|---------------------------------------|--------------------------|------------------------------|
| CF512  | EV                | 13.28 $\pm$ 0.24               | 119 / 120                             |                          |                              |
|        | EV-Vel            | 13.46 $\pm$ 0.26               | 116 / 120                             | 101                      | 0.61                         |
|        | EV-NT219          | 13.47 $\pm$ 0.24               | 114 / 120                             | 101                      | 0.56                         |
|        | <i>daf-2</i> RNAi | 24.07 $\pm$ 0.83               | 114 / 120                             | 181                      | 2.62E-28                     |
| N2     | Ve                | 18.42 $\pm$ 0.44               | 91 / 109                              |                          |                              |
|        | EV-NT219          | 18.45 $\pm$ 0.49               | 83 / 108                              | 100                      | 0.43                         |
|        | <i>daf-2</i> RNAi | 33.35 $\pm$ 1.32               | 93 / 113                              | 181                      | 8.87E-21                     |
